# Supplementary material
Source: HighWire-hosted journal article supplement (https://hw-f5-jim.highwire.org/content/jim-2022-002355)
Supplement: inline-supplementary-material-2 [file inline-supplementary-material-2.pdf]

**Supplemental Table 2.** Forward and reverse primers used to measure expression of adenosine receptors and cholesterol transport proteins.

| Gene           | Sequence                                                                      |
|----------------|-------------------------------------------------------------------------------|
| A2AR           | Forward: 5'-ACCTGCAGAACGTCACCAAC-3'<br>Reverse: 5'-TCTGCTTCAGCTGTCGTCGC-3'    |
| A2BR           | Forward: 5'-CAGACGCCACCAACTACTT-3'<br>Reverse: 5'-GCCACCAGGAAAATCTTAATG-3     |
| A3R            | Forward: 5'-ACTTAGCCGTCTTGA ACTCC-3'<br>Reverse: 5'-ACCACTCACAGAAGAATATG-3'   |
| ABCA1          | Forward: 5'-GAAGTACATCAGAACATGGGC-3'<br>Reverse: 5'-GATCAAAGCCATGGCTGTAG-3'   |
| ABCG1          | Forward: 5'-CAGGAAGATTAGACTGTGG-3'<br>Reverse: 5'-GAAAGGGGAATGGAGAGAAG-3'     |
| 27-hydroxylase | Forward: 5'-AAGCGATACCTGGATGGTTG-3'<br>Reverse: 5'-TGTTGGATGTCGTGTCCACT-3'    |
| LXR- $\alpha$  | Forward: 5'-GGGGCCAGCCCCAAAATGCTG-3'<br>Reverse: 5'-GCATCCGTGGGAACATCAGTCG-3' |
